# Supplementary material for: Plasmid-Mediated Ampicillin, Quinolone, and Heavy Metal Co-Resistance among ESBL-Producing Isolates from the Yamuna River, New Delhi, India
Source: PubMed Central journal article supplement (PMC7699290; doi:10.3390/antibiotics9110826), 2020-11-19
Supplement: antibiotics-09-00826-s001.pdf [file antibiotics-09-00826-s001.pdf]

# Plasmid-Mediated Ampicillin, Quinolone, and Heavy Metal Co-resistance among ESBL-Producing Isolates from the Yamuna River, New Delhi, India

Mohammad Tahir Siddiqui<sup>1</sup>, Aftab Hossain Mondal<sup>1</sup>, Firdoos Ahmad Gogry<sup>1</sup>, Fohad Mabood Husain<sup>2</sup>, Ali Alsalmeh<sup>3</sup> and Qazi Mohd. Rizwanul Haq<sup>1,\*</sup>

<sup>1</sup> Department of Biosciences, Jamia Millia Islamia, New Delhi 110025, India; tahir.sdq@gmail.com (M.T.S.); aftabmicro@gmail.com (A.H.M.); firdous071@gmail.com (F.A.G.)

<sup>2</sup> Department of Food Science and Nutrition, College of Food and Agriculture Sciences, King Saud University, Riyadh 11451, Saudi Arabia; fahadamu@gmail.com

<sup>3</sup> Department of Chemistry, College of Science, King Saud University, Riyadh 11451, Saudi Arabia; aalsalmeh@ksu.edu.sa

\* Correspondence: qhaque@jmi.ac.in, haqqmr@gmail.com; Tel.: +91-11-2698-1717 (ext. 74302); Fax: +91-11-2698-0229

**Supplementary table 1-** Water samples collection sites of river Yamuna from where bacterial strains were isolated (Siddiqui et al 2019).

| S. No | Site Code | Sampling site              | Latitude         | Longitude       |
|-------|-----------|----------------------------|------------------|-----------------|
| 1.    | WBT       | Wazirabad Barrage          | 28°42'40.0212"N  | 77°13'51.2436"E |
| 2.    | MKT       | Majnu ka Tila              | 28°41'43.6308"N  | 77°13'44.7168"E |
| 3.    | BVT       | Buddha Vihar               | 28°40'28.4448"N  | 77°33'56.4888"E |
| 4.    | RBT       | Old Delhi Railway Bridge   | 28°39'50.0328"N  | 77°14'53.8872"E |
| 5.    | GCT       | Geeta Colony               | 28°38'59.5500"N  | 77°15'52.9380"E |
| 6.    | IBT       | ITO Barrage                | 28°37'39.9532"N  | 77°15'10.1448"E |
| 7.    | SRT       | Sarai Kale Khan            | 28°35'21.9480"N  | 77°16'15.1572"E |
| 8.    | MBT       | Maharani Bagh Sub. Station | 28°36'1.3464"N   | 77°15'39.5784"E |
| 9.    | CCT       | Canal Colony               | 28°33'57.3522"N  | 77°17'42.3204"E |
| 10.   | BOT       | Okhla Barrage              | 28°32'38.2092" N | 77°18'48.1752"E |

**Supplementary table 2-** Bacterial strains used in this study with corresponding ESBLs genes and their antibiotics profiling (Siddiqui et al 2019).

| <b>Strains</b>                     | <b>ESBLs genes</b>                   | <b>Antibiotics profiling</b>                        |
|------------------------------------|--------------------------------------|-----------------------------------------------------|
| <i>Bacillus firmus</i> WBT16       | CTX-M15, TEM-116                     | AMP,AT,CAZ, CTX                                     |
| <i>E. coli</i> MKT3                | CTX-M-15, TEM-116, SHV-12            | AMP,P/T,AT,CZ,CAZ,CTX,CTR                           |
| <i>E. coli</i> MKT25               | CTX-M-15, TEM-116                    | AMP,A/S,P/T,AT,CZ,CAZ,CTX,CTR,PB,CIP                |
| <i>Shigella sonnei</i> MKT34       | CTX-M-15, TEM-116                    | AMP,CZ,CTX                                          |
| <i>Bacillus safensis</i> MKT35     | CTX-M-15, TEM-116                    | AMP,CZ,CTX,CAZ                                      |
| <i>K. quasipneumoniae</i> MKT39    | CTX-M-3, TEM-116                     | AMP,CZ,CTX,CAZ, A/S,P/T,AK,PB                       |
| <i>Acinetobacter</i> sp. MKT43     | CTX-M-15, TEM-116                    | AMP,P/T,AT,CZ,CX,C,AZ,CTX,CTR,CIP,TR                |
| <i>Brachymonas chironomi</i> MKT44 | CTX-M-15, CTX-M-152, TEM-116, SHV-12 | AMP,CZ,CX,CAZ,CTX,CTR,PB,CIP,TR                     |
| <i>Acinetobacter</i> sp. MKT45     | CTX-M-15, CTX-M-152, SHV-12          | AMP,AT,CZ,CX,CAZ,CTX,CTR,CIP,TR                     |
| <i>Acinetobacter</i> sp. MKT46     | CTX-M-15                             | AMP,A/S,CZ,TR                                       |
| <i>Acinetobacter</i> sp. MKT48     | CTX-M-15, CTX-M-152, SHV-42          | AMP,CZ,CX,CAZ,CTX,CTR,CIP                           |
| <i>E. coli</i> BVT8                | CTX-M-15, TEM-116                    | AMP,AT,CZ,CX,CAZ,CTX,CTR,PB,C                       |
| <i>E. coli</i> BVT20               | CTX-M-15, SHV-12                     | AMP,A/S,P/T,AT,CZ,CX,CAZ,CTX,CTR,AK,PB,CIP,LE,TE,TR |
| <i>Enterobacter cloacae</i> BVT22  | CTX-M-15, TEM-116, SHV-12            | AT,CZ,CX,CAZ,CTX,PB                                 |
| <i>Enterobacter cloacae</i> BVT29  | CTX-M-15, CTX-M-152, TEM-116, SHV-12 | AMP,A/S,P/T,AT,CZ,CX,CAZ,CTX,CTR,AK,PB,CIP          |
| <i>Enterobacter</i> sp. BVT30      | CTX-M-15                             | CAZ,CTX,CTR,AT                                      |
| <i>Bacillus safensis</i> BVT32     | CTX-M-152, TEM-116                   | CAZ,CTX,CTR,PB,C                                    |
| <i>Enterobacter cloacae</i> BVT34  | CTX-M-15, TEM-116                    | AMP,AT,CZ,CAZ                                       |
| <i>E. coli</i> RBT1                | CTX-M-15                             | AMP,A/S,P/T,AT,IPM,CZ,CX,CAZ,CTX,CTR,PB,TR          |
| <i>Shigella flexneri</i> RBT20     | CTX-M-15, TEM-116                    | AMP,P/T,AT,CZ,CX,CAZ,CTX,CTR,PB,CIP,LE,TE           |
| <i>Acinetobacter</i> sp. RBT26     | CTX-M-15, CTX-M-152, TEM-116         | AMP,CX,CAZ,CTX,CTR,CZ,CIP,TR                        |
| <i>Acinetobacter junii</i> RBT31   | CTX-M-15, CTX-M-152, SHV-12          | AMP,CZ,CAZ,CTX, CTR,TR                              |

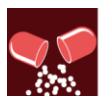

|                                          |                                      |                                                       |
|------------------------------------------|--------------------------------------|-------------------------------------------------------|
| <i>Serratia marcescens</i> RBT37         | CTX-M-15, TEM-116                    | AT,CAZ,CTX,CTR,PB                                     |
| <i>K. pneumoniae</i> RBT40               | CTX-M-15, CTX-M-152                  | AT,CAZ,CTX,CTR,TR                                     |
| <i>Enterobacter cloacae</i> GCT36        | CTX-M-15                             | AMP,A/S,P/T,CZ,CX,CAZ,CTX,CTR,C,TE, TR                |
| <i>Shigella flexneri</i> IBT7            | CTX-M-15, TEM-116                    | AMP,A/S,P/T,AT,CZ,CX,CAZ,CTX,CTR,PB,CIP,LE            |
| <i>E. coli</i> IBT13                     | CTX-M-15, TEM-116, SHV12             | AMP,A/S,P/T,AT,CZ,CX,CAZ,CTX,CTR,AK,PB,CIP,LE,C,TE,TR |
| <i>Acinetobacter junii</i> IBT27         | CTX-M-15                             | AMP,CZ,CTX,CTR,LE                                     |
| <i>Acinetobacter junii</i> IBT29         | CTX-M-15, TEM-116                    | P/T,AT,CX,CAZ,CTX,CTR,CZ,CIP,LE,C,TE,TR               |
| <i>Acinetobacter junii</i> IBT30         | CTX-M-15, CTX-M-152, TEM-116         | CZ,CX,CAZ,CTX,CTR                                     |
| <i>Acinetobacter junii</i> IBT31         | CTX-M-15, CTX-M-152                  | CZ,CX,CTX,TR                                          |
| <i>Acinetobacter junii</i> IBT33         | CTX-M-15, CTX-M-152, TEM-141, SHV-12 | AMP,CZ,CX,CTX,CIP                                     |
| <i>Acinetobacter junii</i> IBT36         | CTX-M-15, TEM-116                    | CZ,TR                                                 |
| <i>Acinetobacter junii</i> IBT39         | CTX-M-15                             | AMP,CZ,CX,CAZ,CTX,CTR,CIP,LE,TR                       |
| <i>Acinetobacter junii</i> IBT40         | CTX-M-15, CTX-M-152, TEM-116         | CZ,CTX                                                |
| <i>E. coli</i> SRT41                     | CTX-M-15, TEM-116                    | AMP,A/S,P/T,AT,CZ, CX,CTX,CTR                         |
| <i>Acinetobacter calcoaceticus</i> SRT58 | CTX-M-15                             | AMP,P/T,CZ,CX,CAZ,CTX,CTR,CIP,C,TR                    |
| <i>Acinetobacter</i> sp. SRT63           | CTX-M-152, TEM-116                   | AT,CAZ                                                |
| <i>Acinetobacter</i> sp. SRT64           | CTX-M-3                              | AMP,CZ,CX,CAZ,CTX,CTR,PB,CIP,TR                       |
| <i>Acinetobacter</i> sp. SRT65           | CTX-M-15                             | AMP,CZ,CX,CAZ,CTX,CTR,PB,CIP,TR                       |
| <i>E. coli</i> MBT16                     | CTX-M-15                             | AMP,A/S,P/T,AT,CZ,CX,CAZ,CTX,CTR                      |
| <i>E. coli</i> MBT29                     | CTX-M-15                             | AMP,A/S,P/T,AT,CZ,CX,CAZ,CTX,CTR,AK,PB,CIP,LE,TE,TR   |
| <i>E. coli</i> MBT42                     | CTX-M-15, TEM-116, SHV-12            | AMP,CZ,TR                                             |
| <i>K. pneumoniae</i> MBT43               | CTX-M-15, TEM-116                    | AT,CAZ,CTX,CTR                                        |
| <i>Enterobacter cloacae</i> MBT49        | CTX-M-15, CTX-M-152, TEM-116         | AT,CAZ,CTX,CTR,P/T                                    |
| <i>K. pneumoniae</i> MBT50               | CTX-M-15                             | AMP,P/T,AT,CZ,CX,CAZ,CTX,AK,PB,CIP                    |
| <i>K. pneumoniae</i> MBT51               | CTX-M-15, TEM-116                    | AMP, AT,CAZ, CTX                                      |
| <i>K. pneumoniae</i> MBT52               | CTX-M-15, SHV-12                     | CAZ,CIP,LE,TE,TR                                      |
| <i>Bacillus firmus</i> MBT57             | CTX-M-15, TEM-116                    | AMP,AT,CZ,CAZ,CTX,CTR                                 |
| <i>K. pneumoniae</i> MBT59               | CTX-M-15, CTX-M-152, TEM-116         | AT,CAZ                                                |



|                                          |                              |                                                      |
|------------------------------------------|------------------------------|------------------------------------------------------|
| <i>E. coli</i> CCT7                      | CTX-M-15, TEM-116            | CAZ,CTX,CTR,AK,PB,CIP,LE,AMP,A/S,P/T,AT,IPM,CZ,TE,TR |
| <i>Enterobacter cloacae</i> CCT13        | CTX-M-15                     | AMP,A/S,P/T,AT,IPM,CZ,CX,CAZ,CTX,CTR,PB,TE,TR        |
| <i>Shigella flexneri</i> CCT27           | CTX-M-15, TEM-116, SHV-12    | AMP,AT,CAZ,CTX                                       |
| <i>E. coli</i> CCT42                     | CTX-M-15, TEM-116            | AMP,A/S,P/T,AT,CZ,CX,CAZ,CTX,CTR,AK,PB,CIP,LE,TE     |
| <i>E. coli</i> CCT43                     | CTX-M-15, TEM-116            | CAZ,CTX,CTR                                          |
| <i>E. coli</i> CCT50                     | CTX-M-15                     | P/T,AT,IPM,CZ,CAZ,CTX,CTR,AK,PB                      |
| <i>Kluyvera georgiana</i> CCT51          | CTX-M-15                     | AT,CAZ,CTX,CTR                                       |
| <i>Shigella flexneri</i> CCT52           | CTX-M-15, CTX-M-152          | AT,CAZ,CTX,CTR                                       |
| <i>Acinetobacter</i> sp. CCT53           | CTX-M-15, CTX-M-152, TEM-116 | CAZ,CTX,CTR                                          |
| <i>Acinetobacter</i> sp. CCT54           | CTX-M-15, TEM-116            | CAZ                                                  |
| <i>Acinetobacter</i> sp. CCT59           | CTX-M-15, CTX-M-152 ‘TEM-181 | AMP,CZ,CX,TR                                         |
| <i>E. coli</i> CCT64                     | CTX-M-15, CTX-M-152, TEM-116 | AT,CAZ,CTX                                           |
| <i>Acinetobacter schindleri</i> CCT65    | CTX-M-15, CTX-M-152, TEM-116 | AMP,CZ,CX,CTX,TR                                     |
| <i>Acinetobacter calcoaceticus</i> CCT66 | CTX-M-15                     | AMP,P/T,AT,CZ,CX,CAZ,CTX,CTR,AK,PB,TR                |
| <i>Kluyvera georgiana</i> CCT69          | CTX-M-152, TEM-116           | AMP,P/T,AT,CZ,CX,CAZ,CTX,AK,PB,TR                    |
| <i>E. coli</i> BOT1                      | CTX-M-15                     | AT,CAZ,CTX,CTR                                       |
| <i>Bacillus altitudinis</i> BOT30        | CTX-M-15, TEM-116            | AT,CAZ,CTR                                           |
| <i>Bacillus firmus</i> BOT39             | CTX-M-15, CTX-M-152          | AMP,P/T,AT,CAZ                                       |
| <i>Acinetobacter</i> sp. BOT40           | CTX-M-15, TEM-116            | AT,CAZ                                               |
| <i>Acinetobacter johnsonii</i> BOT41     | CTX-M-152                    | AMP,AT,CZ,CX,CAZ,CTX,CTR                             |
| <i>Acinetobacter</i> sp. BOT44           | CTX-M-152, TEM-116           | AMP,CZ,CAZ,CTX, CTR,TR                               |
| <i>Enterobacter</i> sp. BOT45            | CTX-M-15, CTX-M-152          | AT,CX,CAZ                                            |
| <i>Acinetobacter schindleri</i> BOT46    | CTX-M-15                     | AMP,CZ,CX,CTX                                        |
